# Supplementary material for: A novel calcineurin-independent activity of cyclosporin A in Saccharomyces cerevisiae
Source: Royal Society of Chemistry journal article supplement (doi:10.1039/c2mb25107h), 2012-06-14
Supplement: c2mb25107h_4.pdf [file c2mb25107h_4.pdf]

|           | probeid       | CsA10  | MF045  | MFandCsA | gene      | essential_gene |
|-----------|---------------|--------|--------|----------|-----------|----------------|
| YNL298W   | YNL298W::chr  | 0.376  | 0.56   | 4.093    | CLA4      | no             |
| YBL061C   | YBL061C::chr2 | -0.276 | 0.647  | 3.688    | SKT5      | no             |
| YAL023C   | YAL023C::chr1 | 0.059  | 0.098  | 3.586    | PMT2      | no             |
| YMR015C   | YMR015C::chr  | -0.326 | 0.455  | 3.507    | ERG5      | no             |
| YJL099W   | YJL099W::chr  | 0.041  | 0.728  | 3.46     | CHS6      | no             |
| YLR332W   | YLR332W::chr  | -0.319 | 0.079  | 3.316    | MID2      | no             |
| YDL066W   | YDL066W::chr  | 0.557  | 0.366  | 3.284    | IDP1      | no             |
| YDR351W   | YDR351W::chr  | -0.21  | 0.288  | 3.117    | SBE2      | no             |
| YCR003W   | YCR003W::chr  | -0.372 | 0.649  | 3.108    | MRPL32    | no             |
| YCR028C   | YCR028C::chr  | -0.212 | -0.519 | 3.065    | FEN2      | no             |
| YBR298C   | YBR298C::chr  | 0.438  | 1.425  | 3.055    | MAL31     | no             |
| YBL062W   | YBL062W::chr  | 0.32   | 0.434  | 3.018    | YBL062W   | no             |
| YOR132W   | YOR132W::chr  | 0.001  | -0.085 | 2.951    | VPS17     | no             |
| YBL083C   | YBL083C::chr2 | -0.107 | 0.262  | 2.943    | YBL083C   | no             |
| YCR061W   | YCR061W::chr  | -0.207 | 0.731  | 2.916    | YCR061W   | no             |
| YJL095W   | YJL095W::chr  | -0.368 | 0.586  | 2.909    | BCK1      | no             |
| YBL047C   | YBL047C::chr2 | -0.22  | 1.535  | 2.889    | EDE1      | no             |
| YCR050C   | YCR050C::chr  | 0.355  | -0.008 | 2.886    | YCR050C   | no             |
| YGL027C   | YGL027C::chr  | 0.469  | -0.111 | 2.884    | CWH41     | no             |
| YML016C   | YML016C::chr  | 0.856  | -0.098 | 2.878    | PPZ1      | no             |
| YCL005W   | YCL005W::chr  | 0.481  | 0.772  | 2.866    | LDB16     | no             |
| YDR276C   | YDR276C::chr  | -0.185 | 1.109  | 2.855    | PMP3      | no             |
| YJL124C   | YJL124C::chr1 | -0.549 | -0.04  | 2.796    | LSM1      | no             |
| YGR228W   | YGR228W::chr  | 0.543  | 0.829  | 2.778    | YGR228W   | no             |
| YCR036W   | YCR036W::chr  | 0.776  | -0.18  | 2.764    | RBK1      | no             |
| YML115C   | YML115C::chr  | 0.552  | 1.159  | 2.754    | VAN1      | no             |
| YBR023C   | YBR023C::chr  | -0.269 | 0.68   | 2.742    | CHS3      | no             |
| YDR388W   | YDR388W::chr  | -0.151 | 1.991  | 2.734    | RVS167    | no             |
| YKL114C   | YKL114C::chr1 | 0.324  | 0.927  | 2.722    | APN1      | no             |
| YLL043W   | YLL043W::chr  | -0.292 | -0.102 | 2.716    | FPS1      | no             |
| YBL006C   | YBL006C::chr2 | 0.134  | 0.396  | 2.705    | LDB7      | no             |
| YKL048C   | YKL048C::chr1 | -0.351 | -0.152 | 2.692    | ELM1      | no             |
| YBL022C   | YBL022C::chr2 | -0.098 | -0.473 | 2.639    | PIM1      | no             |
| YOR106W   | YOR106W::chr  | 0.54   | 0.356  | 2.629    | VAM3      | no             |
| YOL003C   | YOL003C::chr  | 0.362  | 0.801  | 2.624    | PFA4      | no             |
| YNR040W   | YNR040W::chr  | 0.761  | 0.583  | 2.623    | YNR040W   | no             |
| YGR056W   | YGR056W::chr  | 0.353  | 0.868  | 2.567    | RSC1      | no             |
| YJL183W   | YJL183W::chr  | -0.189 | 0.616  | 2.514    | MNN11     | no             |
| YOR198C   | YOR198C::chr  | -0.534 | 0.065  | 2.504    | BFR1      | no             |
| YDR433W   | YDR433W::chr  | -0.061 | 0.267  | 2.503    | YDR433W   | no             |
| YKL135C   | YKL135C::chr1 | 0.009  | 0.583  | 2.503    | APL2      | no             |
| YPL089C   | YPL089C::chr1 | -0.682 | -0.267 | 2.494    | RLM1      | no             |
| YMR031W-A | YMR031W-A::   | 0.148  | 0.591  | 2.485    | YMR031W-A | no             |

|           |                 |        |        |                 |    |
|-----------|-----------------|--------|--------|-----------------|----|
| YHR129C   | YHR129C::chr1   | -0.215 | -0.423 | 2.477 ARP1      | no |
| YPL032C   | YPL032C::chr1   | -0.411 | 0.189  | 2.469 SVL3      | no |
| YNL271C   | YNL271C::chr1   | 0.288  | 0.975  | 2.459 BNI1      | no |
| YLR039C   | YLR039C::chr1   | 1.017  | -1.012 | 2.435 RIC1      | no |
| YLR342W   | YLR342W::chr1   | 2.489  | -0.328 | 2.432 FKS1      | no |
| YJL080C   | YJL080C::chr1   | -0.202 | 0.415  | 2.432 SCP160    | no |
| YNL315C   | YNL315C::chr1   | 0.794  | 2.45   | 2.432 ATP11     | no |
| YNL283C   | YNL283C::chr1   | -0.152 | 0.454  | 2.427 WSC2      | no |
| YMR242C   | YMR242C::chr1   | 0.799  | 0.742  | 2.415 RPL20A    | no |
| YLR370C   | YLR370C::chr1   | -0.401 | 0.559  | 2.38 ARC18      | no |
| YCL001W   | YCL001W-A::chr1 | -0.733 | 0.193  | 2.376 YCL001W-A | no |
| YDR162C   | YDR162C::chr1   | 0.74   | 0.489  | 2.353 NBP2      | no |
| YLR268W   | YLR268W::chr1   | 1.043  | 0.085  | 2.333 SEC22     | no |
| YEL042W   | YEL042W::chr1   | -0.099 | 0.309  | 2.288 GDA1      | no |
| YDR293C   | YDR293C::chr1   | 0.192  | 0.683  | 2.28 SSD1       | no |
| YDR253C   | YDR253C::chr1   | 0.123  | 0.755  | 2.245 MET32     | no |
| YCR009C   | YCR009C::chr1   | -0.731 | 0.992  | 2.228 RVS161    | no |
| YKL212W   | YKL212W::chr1   | 0.825  | -0.799 | 2.226 SAC1      | no |
| YDL203C   | YDL203C::chr1   | -0.061 | 0.319  | 2.222 ACK1      | no |
| YCR068W   | YCR068W::chr1   | -0.252 | 0.498  | 2.192 ATG15     | no |
| YBL046W   | YBL046W::chr1   | 0.425  | 0.354  | 2.181 PSY4      | no |
| YCR087C-A | YCR087C-A::chr1 | -0.474 | 0.216  | 2.179 YCR087C-A | no |
| YGR229C   | YGR229C::chr1   | 0.393  | 0.363  | 2.155 SMI1      | no |
| YAL016W   | YAL016W::chr1   | 0.709  | 0.863  | 2.153 TPD3      | no |
| YBR281C   | YBR281C::chr1   | -0.228 | 0.249  | 2.147 YBR281C   | no |
| YHR142W   | YHR142W::chr1   | -0.458 | 0.462  | 2.141 CHS7      | no |
| YDR448W   | YDR448W::chr1   | 0.662  | 1.235  | 2.14 ADA2       | no |
| YDR432W   | YDR432W::chr1   | 0.182  | 0.544  | 2.133 NPL3      | no |
| YCR079W   | YCR079W::chr1   | 0.187  | 0.35   | 2.133 AUP1      | no |
| YHR060W   | YHR060W::chr1   | 2.074  | -1.044 | 2.133 VMA22     | no |
| YMR152W   | YMR152W::chr1   | -0.249 | 0.622  | 2.128 YIM1      | no |
| YML008C   | YML008C::chr1   | 0.417  | 0.849  | 2.085 ERG6      | no |
| YJR054W   | YJR054W::chr1   | 0.314  | 0.73   | 2.084 YJR054W   | no |
| YLR319C   | YLR319C::chr1   | 0.479  | 0.414  | 2.066 BUD6      | no |
| YDR335W   | YDR335W::chr1   | 0.039  | 0.59   | 2.062 MSN5      | no |
| YJR118C   | YJR118C::chr1   | 1.15   | 1.098  | 2.059 ILM1      | no |
| YLR293C   | YLR293C::chr1   | 0.687  | 0.171  | 2.051 GSP1      | no |
| YCR045C   | YCR045C::chr1   | 0.04   | 0.569  | 2.051 YCR045C   | no |
| YGL012W   | YGL012W::chr1   | 0.374  | 0.19   | 2.021 ERG4      | no |
| YDR108W   | YDR108W::chr1   | 0.422  | -0.129 | 2.002 GSG1      | no |

| feature_type         | GO_process                 | GO_function                   | GO_component            | Cross_Del_Co | Cross_Dels                  |
|----------------------|----------------------------|-------------------------------|-------------------------|--------------|-----------------------------|
| ORF::Verified        | protein amino acid         | protein serine                | actin cap               | 0            |                             |
| ORF::Verified        | response to osmotic stress | enzyme activation             | bud neck*               | 1            | YBL062W Dubious antisense   |
| ORF::Verified        | protein amino acid         | dolichyl-phosphate            | endoplasmic r           | 0            |                             |
| ORF::Verified        | ergosterol biosynthesis    | C-22 sterol de                | endoplasmic r           | 0            |                             |
| ORF::Verified        | Golgi transport            | molecular function            | clathrin-coate          | 0            |                             |
| ORF::Verified        | cell wall organization     | transmembrane                 | integral to pla         | 1            | YLR331C Dubious antisense   |
| ORF::Verified        | glutamate biosynthesis     | isocitrate dehydrogenase      | mitochondrion           | 0            |                             |
| ORF::Verified        | cell wall organization     | molecular function            | Golgi apparatus         | 0            |                             |
| ORF::Verified        | translation                | structural component          | mitochondrial           | 0            |                             |
| ORF::Verified        | endocytosis*               | pantothenate                  | plasma membrane         | 0            |                             |
| ORF::Verified        | alpha-glucosidase          | alpha-glucosidase             | membrane fraction       | 0            |                             |
| ORF::Dubious         |                            |                               |                         | 1            | YBL061C Verified antisense  |
| ORF::Verified        | retrograde transport       | molecular function            | endosome*               | 0            |                             |
| ORF::Dubious         |                            |                               |                         | 1            | YBL082C Verified same sense |
| ORF::Uncharacterized | regulation of cell growth  | molecular function            | cytoplasm               | 0            |                             |
| ORF::Verified        | protein amino acid         | MAP kinase kinase             | intracellular           | 0            |                             |
| ORF::Verified        | endocytosis                | ubiquitin binding             | bud neck*               | 0            |                             |
| ORF::Dubious         |                            |                               |                         | 1            | YCR048W Verified antisense  |
| ORF::Verified        | cell wall organization     | mannosyl-oligosaccharide      | endoplasmic r           | 0            |                             |
| ORF::Verified        | sodium ion homeostasis     | protein serine                | cytoplasm*              | 0            |                             |
| ORF::Verified        | biological process         | molecular function            | mitochondrion           | 0            |                             |
| ORF::Verified        | cation transport           | molecular function            | plasma membrane         | 0            |                             |
| ORF::Verified        | mRNA catabolism            | RNA binding*                  | cytoplasmic r           | 0            |                             |
| ORF::Dubious         |                            |                               |                         | 1            | YGR229C Verified antisense  |
| ORF::Verified        | D-ribose metabolism        | ATP binding*                  | cytoplasm*              | 0            |                             |
| ORF::Verified        | protein amino acid         | mannosyltransferase           | membrane*               | 0            |                             |
| ORF::Verified        | cytokinesis*               | chitin synthase               | cytoplasm*              | 0            |                             |
| ORF::Verified        | endocytosis*               | cytoskeletal protein          | actin cortical junction | 0            |                             |
| ORF::Verified        | telomere maintenance       | DNA-(apurinic nucleoside)     |                         | 0            |                             |
| ORF::Verified        | transport*                 | transporter activity          | cytoplasm*              | 0            |                             |
| ORF::Verified        | telomere maintenance       | molecular function            | RSC complex             | 1            | YBL006W-A Dubious antisense |
| ORF::Verified        | protein amino acid         | protein serine                | contractile ring        | 0            |                             |
| ORF::Verified        | proteolysis*               | ATP-dependent                 | mitochondrial           | 0            |                             |
| ORF::Verified        | vesicle fusion             | t-SNARE activation            | vacuolar membrane       | 0            |                             |
| ORF::Verified        | protein amino acid         | protein-cysteine              | cellular component      | 0            |                             |
| ORF::Uncharacterized | biological process         | molecular function            | mitochondrion           | 0            |                             |
| ORF::Verified        | chromatin reorganization   | molecular function            | RSC complex             | 0            |                             |
| ORF::Verified        | protein amino acid         | alpha-1,6-mannosyltransferase |                         | 0            |                             |
| ORF::Verified        | meiosis*                   | RNA binding                   | nuclear envelope        | 0            |                             |
| ORF::Dubious         |                            |                               |                         | 1            | YDR432W Verified same sense |
| ORF::Verified        | vesicle-mediated transport | clathrin binding              | AP-1 adaptor            | 1            | YKL136W Dubious antisense   |
| ORF::Verified        | cell wall organization     | DNA binding*                  | nucleus                 | 0            |                             |
| ORF::Dubious         |                            |                               |                         | 1            | YMR031C Uncharacterized     |

|                                                               |                              |
|---------------------------------------------------------------|------------------------------|
| ORF::Verifiec establishment structural con dynactin com       | 0                            |
| ORF::Verifiec endocytosis molecular fun cytoplasm*            | 0                            |
| ORF::Verifiec pseudohyphal cytoskeletal r bud neck*           | 0                            |
| ORF::Verifiec intracellular p guanyl-nucleo nucleus*          | 0                            |
| ORF::Verifiec cell wall orgar 1,3-beta-glucæ actin cortical p | 0                            |
| ORF::Verifiec chromatin sile RNA binding* endoplasmic r       | 0                            |
| ORF::Verifiec protein compl unfolded prot mitochondrial       | 0                            |
| ORF::Verifiec cell wall orgar transmembra cytoplasm*          | 0                            |
| ORF::Verifiec translation structural con cytosolic large      | 0                            |
| ORF::Verifiec actin filament structural con Arp2/3 protei     | 0                            |
| ORF::Unchar biological pro molecular fun cellular comp        | 0                            |
| ORF::Verifiec response to h molecular fun cytoplasm*          | 0                            |
| ORF::Verifiec ER to Golgi ve v-SNARE activ endoplasmic r      | 0                            |
| ORF::Verifiec protein aminc guanosine-dip Golgi apparat       | 0                            |
| ORF::Verifiec cell wall orgar RNA binding cytoplasm           | 0                            |
| ORF::Verifiec sulfur amino æ DNA binding* nucleus             | 0                            |
| ORF::Verifiec endocytosis* cytoskeletal p actin cortical p    | 0                            |
| ORF::Verifiec exocytosis* inositol or phc mitochondrioi       | 0                            |
| ORF::Unchar biological pro molecular fun mitochondrioi        | 0                            |
| ORF::Verifiec autophagy* lipase activity integral to me       | 0                            |
| ORF::Unchar biological pro molecular fun nucleus              | 0                            |
| ORF::Unchar biological pro molecular fun nucleolus            | 1 YCR087W Dubious antisense  |
| ORF::Verifiec telomere mai molecular fun nucleus*             | 1 YGR228W Dubious antisense  |
| ORF::Verifiec protein biosyr protein phosp cytoplasm*         | 1 YAL016C-A Dubious antisens |
| ORF::Unchar biological pro molecular fun cytoplasm*           | 0                            |
| ORF::Verifiec ER to Golgi ve molecular fun endoplasmic r      | 0                            |
| ORF::Verifiec histone acetyl transcription (SAGA comple       | 0                            |
| ORF::Verifiec pseudohyphal mRNA binding cytoplasm*            | 1 YDR433W Dubious samesen:   |
| ORF::Unchar biological pro phosphoprote mitochondrioi         | 0                            |
| ORF::Verifiec protein compl unfolded prot endoplasmic r       | 0                            |
| ORF::Verifiec response to D molecular fun cytoplasm*          | 0                            |
| ORF::Verifiec ergosterol bio sterol 24-C-m mitochondrioi      | 0                            |
| ORF::Unchar biological pro molecular fun vacuole (sens        | 0                            |
| ORF::Verifiec actin filament cytoskeletal r actin cap*        | 0                            |
| ORF::Verifiec protein expor protein bindin nucleus            | 0                            |
| ORF::Verifiec mitochondrial molecular fun endoplasmic r       | 0                            |
| ORF::Verifiec rRNA processi GTPase activit cytoplasm*         | 0                            |
| ORF::Unchar biological pro serine-type pe cellular comp       | 1 YCR045W-A Dubious antisen  |
| ORF::Verifiec ergosterol bio delta24(24-1) endoplasmic r      | 0                            |
| ORF::Verifiec ER to Golgi ve molecular fun TRAPP comple       | 0                            |

373 nt 9-381 of 381 bases

371 nt 1-371 of 378 bases

373 nt 1719-2091 of 2091 bases

388 nt 990-1377 of 1377 bases

298 nt 1536-1833 of 1833 bases

328 nt 1191-1518 of 1518 bases

se 150 nt 1-150 of 150 bases

ie 428 nt 818-1245 of 1245 bases

355 nt 45-399 of 399 bases

ntisense 35 nt 1-35 of 2532 bases

462 nt 31-492 of 516 bases  
328 nt 18-345 of 345 bases  
191 nt 1-191 of 315 bases

428 nt 1-428 of 441 bases

351 nt 1-351 of 351 bases
