# Supplementary material for: A novel calcineurin-independent activity of cyclosporin A in Saccharomyces cerevisiae
Source: Royal Society of Chemistry journal article supplement (doi:10.1039/c2mb25107h), 2012-06-14
Supplement: c2mb25107h_5.pdf [file c2mb25107h_5.pdf]

**Table S2. *Saccharomyces cerevisiae* strains used in this study.**

| Strain Name      | Genotype or phenotype            | Source         |
|------------------|----------------------------------|----------------|
| ScLC151          | <i>his3Δ leu2Δ met15Δ ura3Δ</i>  |                |
| (BY4741)         |                                  | 1              |
| ScLC487          | As BY4741, <i>fks1::KAN</i>      | Yeast Deletion |
| ( <i>fks1Δ</i> ) |                                  | Library (YDL)  |
| <i>bck1Δ</i>     | As BY4741, <i>bck1::KAN</i>      | YDL            |
| <i>mid2Δ</i>     | As BY4741, <i>mid2::KAN</i>      | YDL            |
| ScLC489          | As BY4741, <i>chs3::KAN</i>      |                |
| ( <i>chs3Δ</i> ) |                                  | YDL            |
| <i>skt5Δ</i>     | As BY4741, <i>skt5::KAN</i>      | YDL            |
| <i>chs7Δ</i>     | As BY4741, <i>chs7::KAN</i>      | YDL            |
| <i>chc1Δ</i>     | As BY4741, <i>chc1::KAN</i>      | YDL            |
| <i>vps65Δ</i>    | As BY4741, <i>vps65::KAN</i>     | YDL            |
| <i>vps25Δ</i>    | As BY4741, <i>vps25::KAN</i>     | YDL            |
| <i>pop2Δ</i>     | As BY4741, <i>pop2::KAN</i>      | YDL            |
| <i>ilm1Δ</i>     | As BY4741, <i>ilm1::KAN</i>      | YDL            |
| YDR433W          | As BY4741, <i>YDR433W::KAN</i>   | YDL            |
| <i>slg1Δ</i>     | As BY4741, <i>slg1::KAN</i>      | YDL            |
| YOR008C-A        | As BY4741, <i>YOR008C-A::KAN</i> | YDL            |
| <i>vpr1Δ</i>     | As BY4741, <i>vpr1::KAN</i>      | YDL            |
| <i>cka2Δ</i>     | As BY4741, <i>cka2::KAN</i>      | YDL            |
| <i>erg3Δ</i>     | As BY4741, <i>erg3::KAN</i>      | YDL            |

---

|                  |                                           |            |
|------------------|-------------------------------------------|------------|
| <i>vps52Δ</i>    | As BY4741, <i>vps52::KAN</i>              | YDL        |
| <i>vps51Δ</i>    | As BY4741, <i>vps51::KAN</i>              | YDL        |
| <i>rtc2Δ</i>     | As BY4741, <i>rtc2::KAN</i>               | YDL        |
| <i>eos1Δ</i>     | As BY4741, <i>eos1::KAN</i>               | YDL        |
| ScLC11           | As BY4741, <i>cpr1::KAN</i>               | YDL        |
| ( <i>cpr1Δ</i> ) |                                           |            |
| ScLC14           | As BY4741, <i>cnb1::KAN</i>               | YDL        |
| ( <i>cnb1Δ</i> ) |                                           |            |
| ScLC152          | BY4742, <i>his3Δ leu2Δ lys2Δ ura3Δ</i>    | ATCC       |
| ScLC427          | <i>his3Δ leu2Δ met15Δ ura3Δ cnb1::KAN</i> | This study |
| ScLC442          | As BY4741, <i>cpr1::KAN bck1::KAN</i>     | This study |
| ScLC443          | As BY4741, <i>cpr1::KAN bck1::KAN</i>     | This study |
| ScLC444          | As BY4741, <i>cpr1::KAN bck1::KAN</i>     | This study |
| ScLC445          | As BY4741, <i>cpr1::KAN chs3::KAN</i>     | This study |
| ScLC446          | As BY4741, <i>cpr1::KAN chs3::KAN</i>     | This study |
| ScLC447          | As BY4741, <i>cpr1::KAN chs3::KAN</i>     | This study |
| ScLC448          | As BY4741, <i>cpr1::KAN skt5::KAN</i>     | This study |
| ScLC449          | As BY4741, <i>cpr1::KAN skt5::KAN</i>     | This study |
| ScLC450          | As BY4741, <i>cpr1::KAN skt5::KAN</i>     | This study |
| ScLC451          | As BY4741, <i>cpr1::KAN chs7::KAN</i>     | This study |
| ScLC452          | As BY4741, <i>cpr1::KAN chs7::KAN</i>     | This study |
| ScLC453          | As BY4741, <i>cpr1::KAN chs7::KAN</i>     | This study |
| ScLC454          | As BY4741, <i>cnb1::KAN bck1::KAN</i>     | This study |

---

---

|              |                                       |            |
|--------------|---------------------------------------|------------|
| ScLC455      | As BY4741, <i>cnb1::KAN bck1::KAN</i> | This study |
| ScLC456      | As BY4741, <i>cnb1::KAN bck1::KAN</i> | This study |
| ScLC457      | As BY4741, <i>cnb1::KAN chs3::KAN</i> | This study |
| ScLC458      | As BY4741, <i>cnb1::KAN chs3::KAN</i> | This study |
| ScLC459      | As BY4741, <i>cnb1::KAN chs3::KAN</i> | This study |
| ScLC460      | As BY4741, <i>cnb1::KAN skt5::KAN</i> | This study |
| ScLC461      | As BY4741, <i>cnb1::KAN skt5::KAN</i> | This study |
| ScLC462      | As BY4741, <i>cnb1::KAN skt5::KAN</i> | This study |
| <i>cpr2Δ</i> | As BY4741, <i>cpr2::KAN</i>           | YDL        |
| <i>cpr3Δ</i> | As BY4741, <i>cpr3::KAN</i>           | YDL        |
| <i>cpr4Δ</i> | As BY4741, <i>cpr4::KAN</i>           | YDL        |
| <i>cpr5Δ</i> | As BY4741, <i>cpr5::KAN</i>           | YDL        |
| <i>cpr6Δ</i> | As BY4741, <i>cpr6::KAN</i>           | YDL        |
| <i>cpr7Δ</i> | As BY4741, <i>cpr7::KAN</i>           | YDL        |
| <i>cpr8Δ</i> | As BY4741, <i>cpr8::KAN</i>           | YDL        |
| ScLC1275     | <i>his3Δ leu2Δ ura3Δ chs3::NAT</i>    | This study |
| ScLC1278     | As BY4741, <i>chs3::NAT cpr2::KAN</i> | This study |
| ScLC1279     | As BY4741, <i>chs3::NAT cpr2::KAN</i> | This study |
| ScLC1280     | As BY4741, <i>chs3::NAT cpr2::KAN</i> | This study |
| ScLC1281     | As BY4741, <i>chs3::NAT cpr3::KAN</i> | This study |
| ScLC1282     | As BY4741, <i>chs3::NAT cpr3::KAN</i> | This study |
| ScLC1283     | As BY4741, <i>chs3::NAT cpr3::KAN</i> | This study |
| ScLC1284     | As BY4741, <i>chs3::NAT cpr4::KAN</i> | This study |

---

---

|          |                                                                                                                                                                |            |
|----------|----------------------------------------------------------------------------------------------------------------------------------------------------------------|------------|
| ScLC1285 | As BY4741, <i>chs3::NAT cpr4::KAN</i>                                                                                                                          | This study |
| ScLC1286 | As BY4741, <i>chs3::NAT cpr4::KAN</i>                                                                                                                          | This study |
| ScLC1287 | As BY4741, <i>chs3::NAT cpr5::KAN</i>                                                                                                                          | This study |
| ScLC1288 | As BY4741, <i>chs3::NAT cpr5::KAN</i>                                                                                                                          | This study |
| ScLC1289 | As BY4741, <i>chs3::NAT cpr5::KAN</i>                                                                                                                          | This study |
| ScLC1290 | As BY4741, <i>chs3::NAT cpr6::KAN</i>                                                                                                                          | This study |
| ScLC1291 | As BY4741, <i>chs3::NAT cpr6::KAN</i>                                                                                                                          | This study |
| ScLC1292 | As BY4741, <i>chs3::NAT cpr6::KAN</i>                                                                                                                          | This study |
| ScLC1293 | As BY4741, <i>chs3::NAT cpr7::KAN</i>                                                                                                                          | This study |
| ScLC1294 | As BY4741, <i>chs3::NAT cpr7::KAN</i>                                                                                                                          | This study |
| ScLC1295 | As BY4741, <i>chs3::NAT cpr7::KAN</i>                                                                                                                          | This study |
| ScLC1296 | As BY4741, <i>chs3::NAT cpr8::KAN</i>                                                                                                                          | This study |
| ScLC1297 | As BY4741, <i>chs3::NAT cpr8::KAN</i>                                                                                                                          | This study |
| ScLC1298 | As BY4741, <i>chs3::NAT cpr8::KAN</i>                                                                                                                          | This study |
| ScLC1542 | 2229-5C wild type                                                                                                                                              | 2          |
| ScLC1544 | MAT $\alpha$ US50-18C <i>yor1::hisG snq2::hisG pdr5::hisG</i><br>(AD1-9) <i>pdr10::hisG pdr11::hisG ycf1::hisG pdr15::hisG pdr1::hisG</i><br><i>pdr3::hisG</i> | 2          |
| ScLC1711 | 2229-5C <i>chs3::HPH1</i>                                                                                                                                      | This study |
| ScLC1712 | As ScLC1544, <i>chs3::HPH1</i>                                                                                                                                 | This study |
| ScLC1937 | As ScLC1544, <i>chs3::HPH1 cnb1::NAT</i>                                                                                                                       | This study |
| ScLC1938 | As ScLC1544, <i>chs3::HPH1 cnb1::NAT</i>                                                                                                                       | This study |
| ScLC1516 | JK93da WT                                                                                                                                                      | 3          |

---

---

|                    |                                                                                                                                                                                                                              |            |
|--------------------|------------------------------------------------------------------------------------------------------------------------------------------------------------------------------------------------------------------------------|------------|
| ScLC1533           | <i>cpr1::LEU2 cpr2::TRP1 cpr3::HIS3 cpr4::URA3 cpr5::LEU2</i><br><i>cpr6::G418 cpr7::G418 cpr8::MET15 fpr1::ADE2 fpr2::URA3</i><br><i>fpr3::URA3 fpr4::G418 met15 MATa his4 HMLa leu2-3, 112</i><br><i>rme1 trp1 ura3-52</i> | 3          |
| ScLC1708           | JK93da <i>chs3::HPH1</i>                                                                                                                                                                                                     | This study |
| ScLC1710           | As ScLC1533, <i>chs3::HPH1</i>                                                                                                                                                                                               | This study |
| ScLC1939           | As ScLC1710, <i>cnb1::NAT</i>                                                                                                                                                                                                | This study |
| ScLC1940           | As ScLC1710, <i>cnb1::NAT</i>                                                                                                                                                                                                | This study |
| ScLC2333           | MATa, <i>lyp1Δ his3Δ1 leu2Δ0 met15Δ0 ura3Δ0</i>                                                                                                                                                                              |            |
| (WT)               | <i>can1Δ::GMTToolkit-a (CMVpr-rtTA KanMX4 STE2pr-SP-his5)</i>                                                                                                                                                                | 4          |
| ScLC2336           |                                                                                                                                                                                                                              |            |
| (ACB16,<br>RY0513) | As ScLC2333, <i>adp1Δ snq2Δ ycf1Δ pdr15Δ yor1Δ vmr1Δ</i><br><i>pdr11Δ nft1Δ bpt1Δ ybt1Δ ynr070wΔ yol075cΔ aus1Δ pdr5Δ</i><br><i>pdr10Δ pdr12Δ</i>                                                                            | 4          |

---
