# Supplementary material for: A novel calcineurin-independent activity of cyclosporin A in Saccharomyces cerevisiae
Source: Royal Society of Chemistry journal article supplement (doi:10.1039/c2mb25107h), 2012-06-14
Supplement: c2mb25107h_6.pdf [file c2mb25107h_6.pdf]

**Table S3. Primers used in this study.**

| Primer  | Description      | Sequence                  |
|---------|------------------|---------------------------|
| oLC101  | KanB             | CTGCAGCGAGGAGCCGTAAT      |
| oLC149  | CNA1-D           | CAAGACATTGGTTACAAGTCCCTAA |
| oLC274  | pJK863down-F     | CTGTCAAGGAGGGTATTCTGG     |
| oLC325  | CPR1-A (YDR155C) | TCCACTCATTCTGTCTCTGGTAAT  |
| oLC327  | BCK1-A (YJL095W) | GGGAGGTAACGAAGAGAAGAAATAG |
| oLC328  | CHS3-A (YBR023C) | ACATATTTGACATGTGCATGAGACT |
| oLC329  | SKT5-A (YBL061C) | TATAATACATTTGAACATGCCATCG |
| oLC330  | CHS7-A (YHR142W) | TTGAAGTTTGTGACAGAGAATGCTA |
| oLC424  | CPR2-A           | ACAGGAGGACAAACTATAGACAACG |
| oLC425  | CPR3-A           | AGGACCATACCTTCTTGAAGGGTGA |
| oLC426  | CPR4-A           | GCACCACTGCTACTACTACCTCTTC |
| oLC427  | CPR5-A           | ACTCTCACAAGGTCCTAATGTCTTG |
| oLC428  | CPR6-A           | ATTCGGAAAAGAAGAAATGAAAATC |
| oLC429  | CPR7-A           | GTTTGTGATTTATCTCTGGACTGCT |
| oLC430  | CPR8-A           | ATCCTAAAGCAAGATCTCATAACCT |
| oLC659  | pAG25+1165-F     | AGATGCGAAGTTAAGTGCGC      |
| oLC1138 | MX-Fwd           | ACATGGAGGCCCAAGAATACC     |
| oLC1139 | MX-Rev           | CAGTATAGCGACCAGCATTC      |
| oLC1170 | ScCnb1-611-F     | TTAGGGGAAGATATACTAGC      |
| oLC1173 | ScCnb1+1156-R    | ATCAAAGATGGTCTGTCTCC      |
| oLC1388 | Hph+600R         | GAAATCCGCGTGCACGAGGT      |

---

|         |             |                                                                         |
|---------|-------------|-------------------------------------------------------------------------|
| oLC1389 | Hph+377F    | CCGATCTTAGCCAGACGAGC                                                    |
| oLC1447 | chs3-D      | AAATTGGAAATGCCACAGATAAATA                                               |
| oLC1519 | chs3-pAG25F | TTCAAAGGTCCTGTTTAGACTATCCGCAGGAAAG<br>AAATTAGAATG CCAGCTGAAGCTTCGTACGC  |
| oLC1520 | chs3-pAG25R | TATCAACTTGTAAGTATCACAGTAAAAATATTTT<br>CATACTGTCTA CATCGATGAATTTCGAGCTCG |

---
