# Supplementary figures and images for: A novel calcineurin-independent activity of cyclosporin A in Saccharomyces cerevisiae
Source: Royal Society of Chemistry journal article supplement (doi:10.1039/c2mb25107h), 2012-06-14

# Singh-Babak et al. Figure S1.

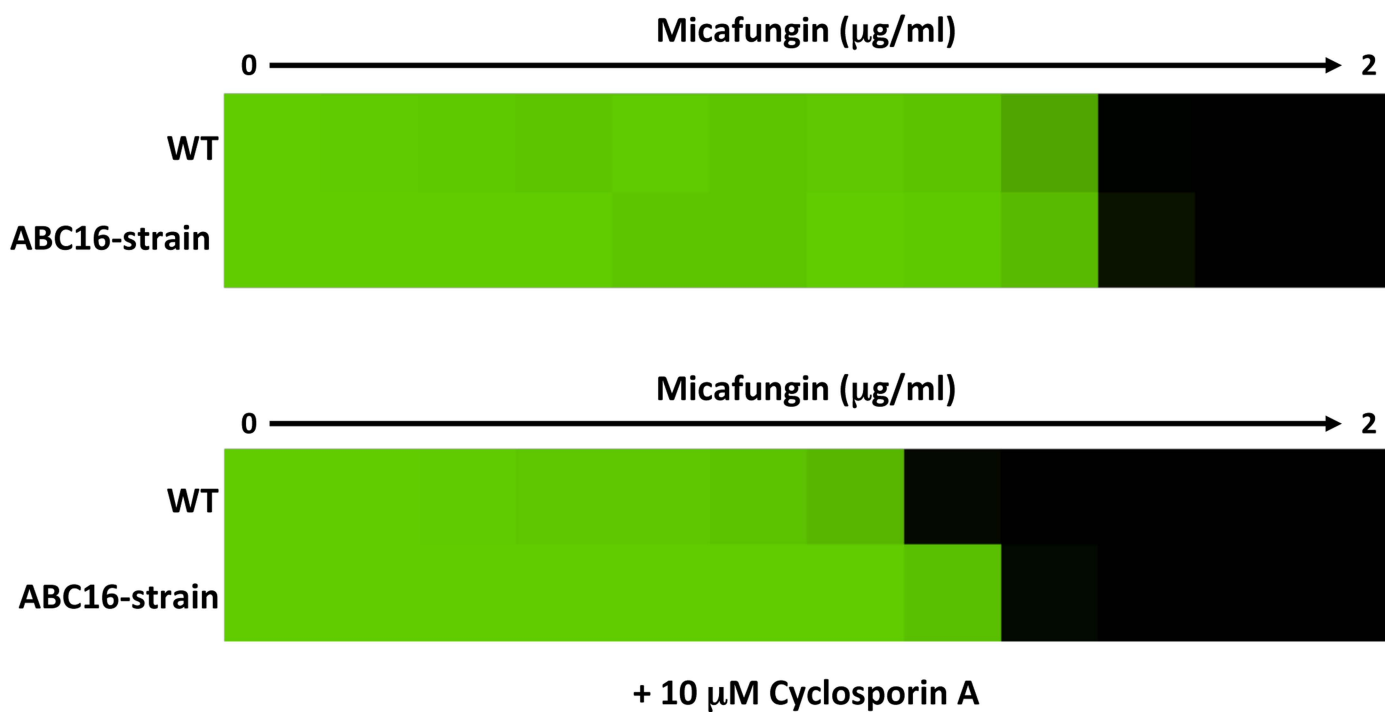

Supplement: c2mb25107h_2.pdf [file c2mb25107h_2.pdf]

# Singh-Babak et al. Figure S2.

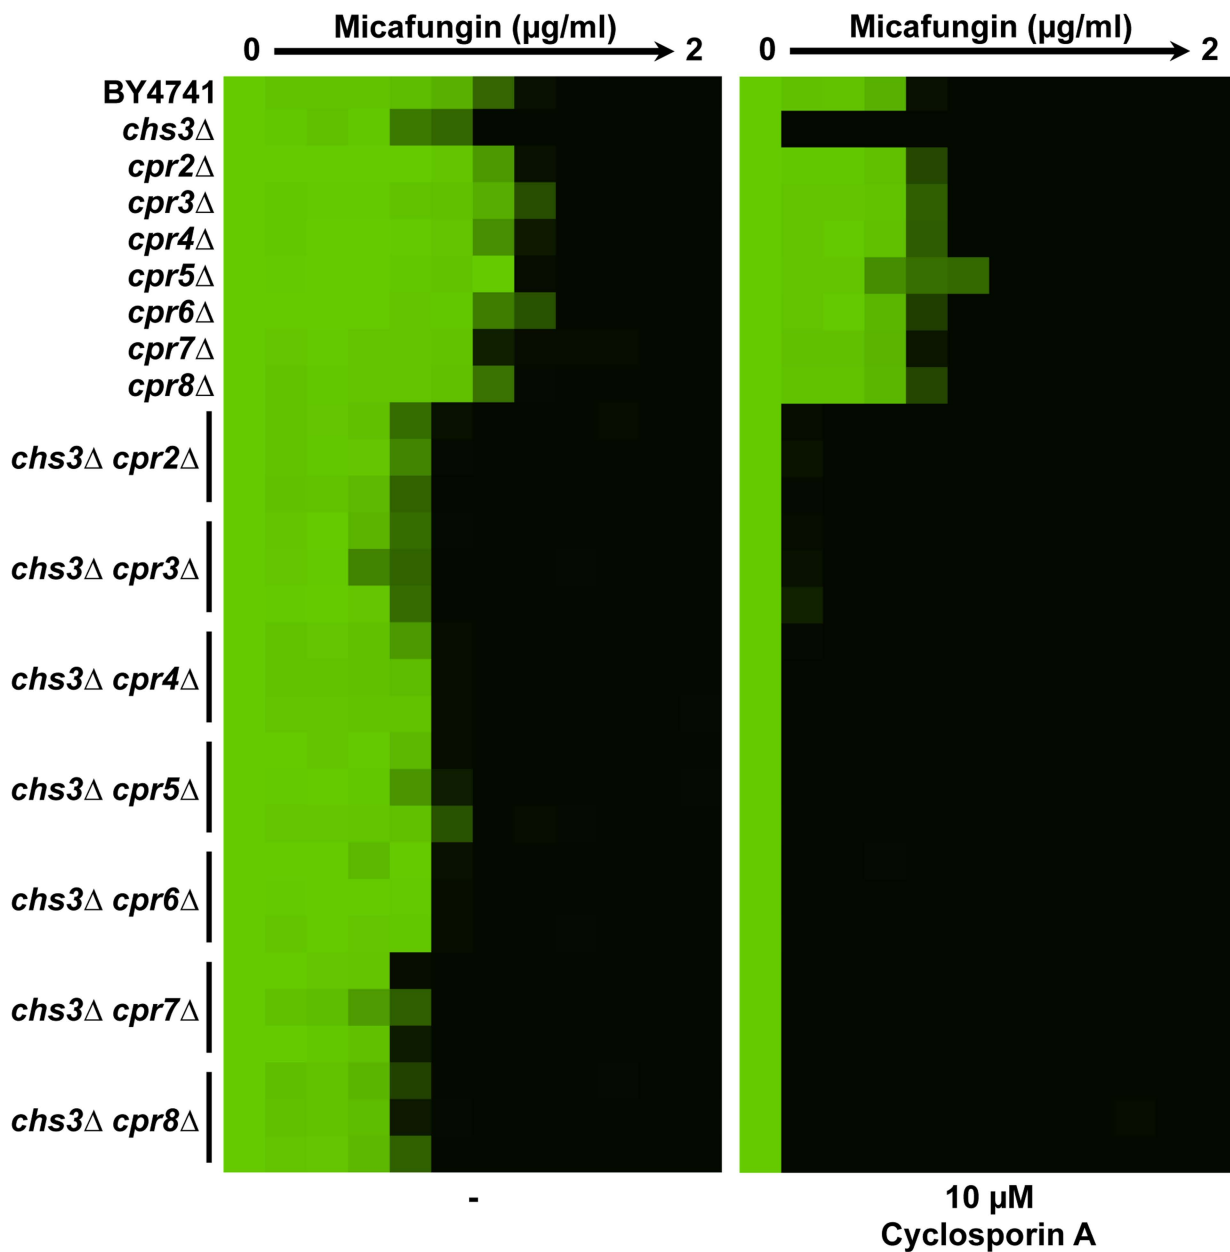

Supplement: c2mb25107h_3.pdf [file c2mb25107h_3.pdf]
